# Supplementary material for: Necessity of dural tenting sutures in modern neurosurgery: protocol for a systematic review
Source: PubMed Central journal article supplement — BMJ Open. 2019 Feb 3;9(2):e027904. doi: 10.1136/bmjopen-2018-027904 (PMC6367978; doi:10.1136/bmjopen-2018-027904), 2019-02-03
Supplement: bmjopen-2018-027904.draft_revisions.pdf [file bmjopen-2018-027904.draft_revisions.pdf]

# BMJ Open

BMJ Open is committed to open peer review. As part of this commitment we make the peer review history of every article we publish publicly available.

When an article is published we post the peer reviewers' comments and the authors' responses online. We also post the versions of the paper that were used during peer review. These are the versions that the peer review comments apply to.

The versions of the paper that follow are the versions that were submitted during the peer review process. They are not the versions of record or the final published versions. They should not be cited or distributed as the published version of this manuscript.

BMJ Open is an open access journal and the full, final, typeset and author-corrected version of record of the manuscript is available on our site with no access controls, subscription charges or pay-per-view fees (<http://bmjopen.bmj.com>).

If you have any questions on BMJ Open's open peer review process please email [info.bmjopen@bmj.com](mailto:info.bmjopen@bmj.com)

# BMJ Open

## The Necessity Of Dural Tenting Sutures In Modern Neurosurgery: Protocol For A Systematic Review

|                               |                                                                                                                                                                                                                                                                                                                                                                                                                                                                                                                                                                                                                                                                                                                                                                                                                                                                                                                                                                                                                                                                                                                                                                                                                                                                                                                                                                                                                                                                                |
|-------------------------------|--------------------------------------------------------------------------------------------------------------------------------------------------------------------------------------------------------------------------------------------------------------------------------------------------------------------------------------------------------------------------------------------------------------------------------------------------------------------------------------------------------------------------------------------------------------------------------------------------------------------------------------------------------------------------------------------------------------------------------------------------------------------------------------------------------------------------------------------------------------------------------------------------------------------------------------------------------------------------------------------------------------------------------------------------------------------------------------------------------------------------------------------------------------------------------------------------------------------------------------------------------------------------------------------------------------------------------------------------------------------------------------------------------------------------------------------------------------------------------|
| Journal:                      | <i>BMJ Open</i>                                                                                                                                                                                                                                                                                                                                                                                                                                                                                                                                                                                                                                                                                                                                                                                                                                                                                                                                                                                                                                                                                                                                                                                                                                                                                                                                                                                                                                                                |
| Manuscript ID                 | bmjopen-2018-027904                                                                                                                                                                                                                                                                                                                                                                                                                                                                                                                                                                                                                                                                                                                                                                                                                                                                                                                                                                                                                                                                                                                                                                                                                                                                                                                                                                                                                                                            |
| Article Type:                 | Protocol                                                                                                                                                                                                                                                                                                                                                                                                                                                                                                                                                                                                                                                                                                                                                                                                                                                                                                                                                                                                                                                                                                                                                                                                                                                                                                                                                                                                                                                                       |
| Date Submitted by the Author: | 13-Nov-2018                                                                                                                                                                                                                                                                                                                                                                                                                                                                                                                                                                                                                                                                                                                                                                                                                                                                                                                                                                                                                                                                                                                                                                                                                                                                                                                                                                                                                                                                    |
| Complete List of Authors:     | <p>Przepiórka, Łukasz; Department of Neurosurgery, Medical University of Warsaw</p> <p>Kunert, Przemysław; Department of Neurosurgery, Medical University of Warsaw</p> <p>Żyłkowski, Jarosław; Second Department of Radiology, Medical University of Warsaw</p> <p>Fortuniak, Jan; Department of Neurosurgery and Oncology of Central Nervous System, Barlicki University Hospital, Medical University of Lodz</p> <p>Larysz, Patrycja; Department of Neurosurgery, Medical University of Silesia, Regional Hospital, Sosnowiec</p> <p>Szczepanek, Dariusz; Neurosurgery and Pediatric Neurosurgery Department in Lublin, Medical University of Lublin</p> <p>Wiśniewski, Karol; Department of Neurosurgery and Oncology of Central Nervous System, Barlicki University Hospital, Medical University of Lodz</p> <p>Jaskólski, Dariusz; Department of Neurosurgery and Oncology of Central Nervous System, Barlicki University Hospital, Medical University of Lodz</p> <p>Ładziński, Piotr; Department of Neurosurgery, Medical University of Silesia, Regional Hospital, Sosnowiec</p> <p>Rola, Radosław; Neurosurgery and Pediatric Neurosurgery Department in Lublin, Medical University of Lublin</p> <p>Trojanowski, Tomasz; Neurosurgery and Pediatric Neurosurgery Department in Lublin, Medical University of Lublin</p> <p>Marchel, Andrzej; Department of Neurosurgery, Medical University of Warsaw, Department of Neurosurgery, Medical University of Warsaw</p> |
| Keywords:                     | craniotomy, extradural hematoma, dural tenting sutures                                                                                                                                                                                                                                                                                                                                                                                                                                                                                                                                                                                                                                                                                                                                                                                                                                                                                                                                                                                                                                                                                                                                                                                                                                                                                                                                                                                                                         |
|                               |                                                                                                                                                                                                                                                                                                                                                                                                                                                                                                                                                                                                                                                                                                                                                                                                                                                                                                                                                                                                                                                                                                                                                                                                                                                                                                                                                                                                                                                                                |

SCHOLARONE™  
Manuscripts

## Title page

# The Necessity Of Dural Tenting Sutures In Modern Neurosurgery: Protocol For A Systematic Review

## Authors

Łukasz Przepiórka<sup>1</sup>, Przemysław Kunert<sup>1</sup>, Jarosław Żyłkowski<sup>2</sup>, Jan Fortuniak<sup>3</sup>, Patrycja Larysz<sup>4</sup>, Dariusz Szczepanek<sup>5</sup>, Karol Wiśniewski<sup>3</sup>, Dariusz Jaskólski<sup>3</sup>, Piotr Ładziński<sup>4</sup>, Radosław Rola<sup>5</sup>, Tomasz Trojanowski<sup>5</sup>, Andrzej Marchel<sup>1</sup>

## Affiliation

1 Department of Neurosurgery, Medical University of Warsaw, Warsaw, Poland

2 Second Department of Radiology, Medical University of Warsaw, Warsaw, Poland

3 Department of Neurosurgery and Oncology of Central Nervous System, Barlicki University Hospital, Medical University of Lodz, Lodz, Poland

4 Department of Neurosurgery, Medical University of Silesia, Regional Hospital, Sosnowiec, Poland

5 Neurosurgery and Pediatric Neurosurgery Department in Lublin, Medical University of Lublin, Lublin, Poland

## Contact information

Przemysław Kunert, Department of Neurosurgery, Medical University of Warsaw, Banacha St. 1a, 02-097 Warsaw, Poland, fax: +48 22 658 3653, email: przemyslaw.kunert@wum.edu.pl

## Guarantor of the review

Łukasz Przepiórka

## Contributions

ŁP conceived the presented idea and prepared the manuscript; PK critically revised the manuscript, AM validated the final version of the manuscript; JŻ analyzed the data; DJ, JF, and KW contributed to the design of the study; PŁ and PL helped supervise the project; RR, DS, and TT provided the methodologic background. All authors reviewed the final manuscript.

## Amendments

In the event of protocol amendments, the date of each amendment will be accompanied by a description of the change and the rationale.

## Sponsor

none

## Role of a sponsor and funder

not applicable

## 35 Abstract

### 36 Introduction

37 The ongoing need for dural tenting sutures in a contemporary neurosurgical practice has been  
38 questioned in the literature for over two decades. In the past, these sutures were supposed to  
39 prevent blood collecting in the potential space between the skull and the dura by elevating the  
40 latter. Theoretically, with modern hemostasis and proper postoperative care, this technique  
41 should not be necessary and the surgery time can be shortened. Unfortunately, there is no  
42 evidence-based proof to either support or reject this hypothesis.

### 43 Methods and analysis

44 The systematic review will be performed according to the Preferred Reporting Items for  
45 Systematic Reviews and Meta-Analysis (PRISMA) statement and The Cochrane Handbook for  
46 Systematic Reviews of Interventions. Eight electronic databases of peer-reviewed journals will be  
47 searched, as well as other sources. Eligible articles will be assessed against inclusion criteria.  
48 The intervention is not tenting the dura and this will be compared with the usual dural tenting  
49 sutures. Where possible, “summary of findings” tables will be generated.

### 50 Ethics and dissemination

51 Ethical committee approval is not required for a systematic review protocol. Findings will be  
52 presented at international neurosurgical conferences and published in a peer-reviewed medical  
53 journal.

### 54 Systematic review registration

55 PROSPERO 2018 CRD42018097089

### 56 Keywords

57 Dural tenting sutures, craniotomy, extradural hematoma

## 58 Strengths and limitations of this study

- 59 • To the best of our knowledge, this will be the first systematic review evaluating the necessity of  
60 dural tenting sutures.
- 61 • To obtain enough patient data, observational studies will be included with randomized  
62 controlled trials.
- 63 • The choice of inclusion criteria remains controversial.

## 64 Introduction

65 In the early days of neurosurgery, extradural hemorrhage (EDH) contributed to high mortality after  
66 craniotomies. Almost a century ago, Walter Dandy reported dural tenting sutures as an effective  
67 way of preventing postoperative EDH.<sup>1</sup> Over time, his technique gained in popularity and  
68 significance to finally become a neurosurgical standard. Dural tenting is a well-known method of  
69 stitching the dura to the bone or pericranium after craniotomy. This decreases the extradural  
70 space where EDH could arise and compresses dural vessels, which are potential sources of EDH.  
71 These sutures are known by many names (Table 1).<sup>2</sup> In addition, some terms distinguish dural  
72 tenting sutures that are placed in the center of the dural opening from those near the edge. These  
73 Poppen sutures are named after J.L. Poppen, and are one of his many contributions to  
74 neurosurgery.<sup>3</sup>

75 Throughout the last 20 years, several researchers have expressed their growing doubt about the  
76 role of tenting sutures in contemporary neurosurgical practice. There have been several  
77 retrospective reports questioning the ongoing need for dural tenting sutures.<sup>2 4-6</sup> Apparently,  
78 Dandy's explanation about hemostasis under hypotensive conditions being deceiving and  
79 eventually causing EDH may be obsolete. These days, proper anesthesiology, including  
80 normovolemia and normotension, enables real-time evaluation of the hemostasis. The latter has  
81 been further improved by modern hemostatic agents, such as bone wax, electrocautery, oxidized  
82 cellulose polymer materials, collagen sponges, etc. Altogether, these improvements may be  
83 enough for effective extradural hemostasis. Reports of some surgeons avoiding dural tenting  
84 sutures, in some papers<sup>5 7</sup> or in day-to-day practice, further supports this explanation.

## 85 Study rationale

86 There is a risk of EDH formation – supposedly decreased with the use of dural tenting sutures –  
87 in the postoperative period and this should not be ignored. However, as mentioned earlier, studies

1  
2  
3 88 (the majority retrospective) have implied not tenting the dura is safe. Dural tenting prolongs the  
4  
5 89 time of surgery, which may be a reason to omit these sutures. Moreover, the sutures may  
6  
7 90 potentially increase the risk of adverse effects, such as cerebrospinal fluid (CSF) leak and  
8  
9 91 damage to cortical matter or blood vessels with subsequent subdural or intracerebral hemorrhage.  
10  
11 92 There have also been several reports of more unusual complications like subdural hygroma,<sup>8</sup>  
12  
13 93 granuloma,<sup>9</sup> or pial arteriovenous fistula.<sup>10</sup> Thus, refraining from dural tenting sutures would  
14  
15 94 shorten the surgery and reduce the operative risk.

16  
17  
18 95 Therefore, evaluation of this procedure is interesting not only from the surgical point of view, but  
19  
20 96 also by modern, evidence-based standards. Not a single systematic review has been performed  
21  
22 97 to date to establish the necessity of dural tenting. Moreover, its impact on short-term postoperative  
23  
24 98 headaches or CSF leak has not been established in an evidence-based manner. Thus, a  
25  
26 99 systematic review is necessary and subsequently allows for a meta-analysis. However, many  
27  
28 100 researches have evoked *a priori* preparation of protocols for a systematic review.<sup>11</sup> The aim of  
29  
30 101 registration and/or publication of protocols is to increase the quality of subsequent systematic  
31  
32 102 reviews. This is achieved by external editorial systems reducing publication bias and improving  
33  
34 103 transparency and accuracy.

## 35 36 37 38 39 104 Objective

40  
41 105 To prepare a protocol for a systematic review that will determine the safety of not tenting the dura  
42  
43 106 during an elective craniotomy.

## 44 45 46 47 107 Methods and analysis

48  
49 108 The review will be conducted according to the Cochrane Handbook for Systematic Reviews of  
50  
51 109 Intervention<sup>12</sup> and data will be reported in coherence with the PRISMA statement  
52  
53 110 recommendations.<sup>11</sup> The quality of evidence for each outcome will be assessed according to the  
54  
55  
56  
57  
58  
59  
60

1  
2  
3 111 Grading of Recommendations Assessment, Development, and Evaluation (GRADE) framework.<sup>13</sup>  
4  
5 112 EndNote X8.2 (or newer version) and Review Manager 5.3 (or newer version) software will be  
6  
7 113 used for electronic data management. This review has been registered with PROSPERO  
8  
9 114 (registration number: CRD42018097089). Moreover, this protocol follows the PRISMA-P 2015  
10  
11 115 statement.<sup>14</sup>  
12  
13

## 14 116 Eligibility criteria

15  
16  
17 117 The type of studies included will be primarily randomized controlled trials (RCT) and quasi-RCTs.  
18  
19 118 Moreover, to obtain enough statistical power, the study will also include cross-over studies,  
20  
21 119 published in English literature after 1970, and case series.  
22  
23

## 24 120 Participants

25  
26 121 The participants will include all patients who qualify for a craniotomy, regardless of their diagnosis.  
27  
28 122 Demographic criteria will not be limited.  
29  
30

## 31 123 Interventions and comparisons

32  
33  
34 124 As tenting the dura is a widely accepted reference method, it is the authors' firm belief that the  
35  
36 125 intervention should be not tenting the dura. Thus, patients with dural tenting sutures would  
37  
38 126 constitute a control group. However, different allocations of control and intervention groups will  
39  
40 127 be included as well as a comparison of dural tenting and not tenting. The intervention will be  
41  
42 128 considered in a dichotomous manner using minimum information, such as "tenting the dura" and,  
43  
44 129 conversely, "not tenting the dura", regardless of the number, position, or type of sutures.  
45  
46

## 47 130 Outcomes

48  
49 131 The outcomes that are considered likely to be meaningful are: reoperation due to EDH and the  
50  
51 132 postoperative 30-day mortality. However, the latter is not suitable for a primary endpoint as it is  
52  
53 133 affected by many factors (for instance, preoperative condition of the patient and type of  
54  
55  
56  
57  
58  
59  
60

1  
2  
3 134 intracranial lesion) and the heterogeneity of the group. Thus, reoperation due to EDH should be  
4  
5 135 the primary outcome, as it is the most accurate way to measure the safety of not tenting the dura.  
6  
7

## 8 136 Information sources

9  
10 137 The systematic review will cover standard bibliographic databases: MEDLINE, PUBMED,  
11  
12 138 EMBASE, Google Scholar, Cochrane Library, ProQuest, ScienceDirect, as well as trial registers  
13  
14 139 (clinicaltrials.gov, EU register, ISRCTN), conference abstracts and grey literature searched with  
15  
16 140 Google Web Search, and systematic review registers (PROSPERO). Moreover, the references  
17  
18 141 of all relevant articles will be scanned.  
19  
20

## 21 142 Search strategy

22  
23  
24 143 The search strategy for PUBMED and EMBASE is presented in Table 2. Table 3 provides  
25  
26 144 additional search phrases that may support and/or modify the main search. A PRISMA flow  
27  
28 145 diagram will be included in the review.  
29  
30

## 31 146 Study records

## 32 147 Selection process

33  
34  
35 148 All search results will be imported into EndNote and the software will remove any duplicates.  
36  
37 149 Then, two independent reviewers (ŁP, PK) will perform a preliminary screening of titles and  
38  
39 150 abstracts for inclusion. At this stage, all conflicts will be included. Next, the full text of studies will  
40  
41 151 be obtained, and two reviewers will apply inclusion criteria to identify relevant studies to be  
42  
43 152 included in the systematic review. Conflicts will be discussed, and when needed, a third reviewer  
44  
45 153 (AM) will be involved. The review will contain a table of included and excluded studies with their  
46  
47 154 characteristics and reasons for inclusion and exclusion.  
48  
49  
50  
51  
52  
53  
54  
55  
56  
57  
58  
59  
60



## 155 Data collection process and data items

156 Data will be extracted by one author (ŁP) using a previously prepared standardized form at the  
157 study level. The following data will be obtained: 1) characteristics of the group of participants (age,  
158 sex, diagnosis); 2) type of surgery (supratentorial vs. infratentorial vs. skull base, elective vs.  
159 emergency, craniotomy vs. craniectomy) and indication (aneurysm, tumor, trauma, epilepsy, etc.);  
160 3) definition of an intervention (number of tenting sutures, information about wound drainage,  
161 hemostatic agents used during closure of the dura) and a control group; and 4) outcome measures  
162 (number of EDH, number of reoperations, deaths, midline shift, size and volume of extradural  
163 collections), as discussed earlier.

## 164 Risk of bias in individual studies

165 The risk of bias in the individual studies will be assessed at the study level. It will be performed  
166 by one author (ŁP) using the Cochrane Collaboration's Risk of Bias Tool [15](#) and checked by a  
167 second reviewer (PK).

## 168 Data Synthesis

169 There will be two categories of data collection depending on the type of endpoint, either binary or  
170 continuous. Risk ratios will be calculated to measure the risk of specific events, such as  
171 reoperation due to extradural hematoma, CSF leak, death, and the standardized mean  
172 differences for the midline shift, volume, and size of the extradural collection. We will pool the  
173 results using a random-effects meta-analysis, with standardized mean differences for continuous  
174 outcomes and risk ratios for binary outcomes, and calculate 95% confidence intervals and two  
175 sided P values for each outcome. The heterogeneity of effect measures between the studies will  
176 be assessed using both the  $\chi^2$  test and the I<sup>2</sup> statistic. We will consider an I<sup>2</sup> value greater than  
177 50% to be indicative of substantial heterogeneity.

## 178 Subgroup analysis

179 If sufficient data are available, we plan to conduct subgroup analyses according to craniotomy vs.  
180 craniectomy, supratentorial vs. infratentorial surgery, skull base vs. no skull base in range of the  
181 surgery, and elective vs. emergency surgery. Such actions will allow the identification of potential  
182 sources of heterogeneity.

## 183 Discussion

184 The choice of proper eligibility criteria is important when conducting a systematic review. In this  
185 protocol, there was a lot consideration regarding the choice of population, intervention,  
186 comparison and outcome (PICO). Some authors regard only craniotomies as suitable for the  
187 study, in contrast to craniectomies. The reason for this is that restored bone allows the  
188 measurement of the potential fluid collection volume in intracranial-extradural space and the  
189 assessment of how it affects the whole brain in the closed cranial cavity. Nevertheless, it is  
190 reasonable to include studies with craniectomies.

191 Other valuable endpoints could include any new neurologic deficit or previously existing  
192 deterioration, an external or internal CSF leak requiring treatment, deterioration of postoperative  
193 headaches, extradural fluid collection (EDH, CSF, air, etc.), and the midline shift. None of these  
194 will be included if there is not enough data for testing.

195 Examining the most basic and elementary procedures may, surprisingly, be the most challenging  
196 and intimidating task. Due to a lack of such actions, it is possible that most brain surgeons have  
197 been using surgical techniques that bring no benefit and only extend the operation. Hence, there  
198 is a great need for this study. The results may finally determine if dural tenting sutures are  
199 necessary in modern neurosurgery.

## Tables

| Dural tenting sutures synonyms |
|--------------------------------|
| Hitch sutures                  |
| Tack-up sutures                |
| Dural periosteal sutures       |
| Tacking sutures                |
| Stay sutures                   |
| Suspension sutures             |
| Sleeper sutures                |
| Dandy sutures                  |
| Poppen sutures                 |

Table 1. Synonyms of dural tenting sutures

### Search strategy for PubMed database

"dural sutures" OR "dural tenting sutures" OR "dura mater sutures" OR "dural stitches" OR  
 "dural tenting stitches" OR "dura mater stitches" OR "hitch sutures" OR "hitch sutures of the  
 dura" OR "hitching of the dura" OR "dural hitching" OR "hitch sutures of the dura" OR "hitching  
 the dura" OR "hitching of the dura"  
 OR "tenting sutures" OR "tenting stitches" OR "tenting of the dura" OR "dural tenting" OR "dural  
 tenting sutures" OR "dural tenting stitches" OR "tack-up sutures" OR "tack-up stitches" OR  
 "tack-up dura" OR "tack-up dural" OR "tacking sutures" OR "tacking sutures" OR "tacking dura  
 sutures" OR "tacking dural sutures" OR "tacking dura" OR "tacking dural stitches" OR "tacking  
 dural stitches" OR "tacking up dura" OR "tacking up sutures" OR "tacking up stitches" OR  
 "dural periosteal sutures" OR "dural periosteal stitches" OR "stay sutures" OR "dural stay  
 sutures" OR "stay sutures" OR "dural stay stitches" OR "suspension sutures" OR "suspension  
 dural sutures" OR "suspension dura sutures" OR "suspension stitches" OR "suspension dural  
 stitches" OR "suspension dura stitches" OR "dural suspension" OR "suspending the dura" OR  
 "suspension of the dura" OR "sleeper sutures" OR "sleeper stitches" OR "epidural sutures" OR  
 "epidural stitches" OR "dural suture" OR "dural tenting suture" OR "dura mater suture" OR  
 "dural stitch" OR "dural tenting stitch" OR "dura mater stitch" OR "hitch stitch" OR "hitch stitch  
 of the dura" OR "hitching of the dura" OR "dural hitching" OR "hitch stitch of the dura" OR  
 "hitching the dura" OR "hitching of the dura" OR "tenting suture" OR "tenting stitch" OR "tenting  
 of the dura" OR "dural tenting" OR "dural tenting suture" OR "dural tenting stitch" OR "tack-up  
 suture" OR "tack-up stitch" OR "tack-up dura" OR "tack-up dural" OR "tacking stitch" OR  
 "tacking suture" OR "tacking dura suture" OR "tacking dural suture" OR "tacking dura" OR  
 "tacking dural stitch" OR "tacking dural stitch" OR "tacking up dura" OR "tacking up suture"  
 OR "tacking up stitch" OR "dural periosteal suture" OR "dural periosteal stitch" OR "stay suture"  
 OR "dural stay suture" OR "stay stitch" OR "dural stay stitch" OR "suspension suture" OR  
 "suspension dural suture" OR "suspension dura suture" OR "suspension stitch" OR  
 "suspension dural stitch" OR "suspension dura stitch" OR "dural suspension" OR "suspending  
 the dura" OR "suspension of the dura" OR "sleeper suture" OR "sleeper stitch" OR "epidural  
 suture" OR "epidural stitch"

Table 2. PubMed search strategy

**Additional search phrases in PubMed database**

|                                                                                                                 |
|-----------------------------------------------------------------------------------------------------------------|
| ("Dura Mater/surgery"[Mesh]) AND ("Hematoma, Epidural, Cranial/prevention and control"[Mesh])                   |
| ((("Dura Mater"[Mesh] OR "Dura Mater"[TW])) AND ("Suture Techniques"[Mesh] OR ["Suture Techniques"[TW]))        |
| ("Dura Mater"[Mesh]) AND "Hematoma, Epidural, Cranial/prevention and control"[Mesh]                             |
| ((("Postoperative Period"[Mesh] OR "Postoperative Period"[text word])) AND "Hematoma, Epidural, Cranial"[Mesh]) |

Table 3. Additional search phrases in PubMed database.

For peer review only

## References

1. Dandy WE. Surgery of the brain. Hagerstown, Md.: Prior 1945.
2. Winston KR. Efficacy of dural tenting sutures. *J Neurosurg* 1999;91(2):180-4. doi: 10.3171/jns.1999.91.2.0180 [published Online First: 1999/08/05]
3. Poppen JL. Prevention of postoperative extradural hematoma. *Archives of Neurology & Psychiatry* 1935;34(5):1068-69. doi: 10.1001/archneurpsyc.1935.02250230140012
4. Winston KR. Dural tenting sutures in pediatric neurosurgery. *Pediatr Neurosurg* 1998;28(5):230-5. doi: 10.1159/000028656 [published Online First: 1998/09/10]
5. Swayne OB, Horner BM, Dorward NL. The hitch stitch: an obsolete neurosurgical technique? *British journal of neurosurgery* 2002;16(6):541-4; discussion 44. [published Online First: 2003/03/06]
6. Gunasena P, Bandara L, Jayaratne C, et al. Evaluation of risk of developing EDH associated with large craniectomy closure without hitching the dura. *Brain injury* 2010;24(3):129. doi: 10.3109/02699051003648227
7. Winston KR. Efficacy of dural tenting sutures. *Journal of neurosurgery* 1999;91(2):180-84.
8. Jha AN, Morris K. Iatrogenic ex vacuo subdural hygroma: and a complication of the modified "Poppen" suture. *Journal of neurology, neurosurgery, and psychiatry* 1986;49(9):1084-5. [published Online First: 1986/09/01]
9. Onodera H, Furuya Y, Uchida M, et al. Intracranial foreign body granuloma caused by dural tenting suture. *British journal of neurosurgery* 2011;25(5):652-4. doi: 10.3109/02688697.2011.568641 [published Online First: 2011/08/19]
10. Nishiyama Y, Kanemaru K, Yoshioka H, et al. Intracranial pial arteriovenous fistula caused by dural tenting: Case report. *Neurologia medico-chirurgica* 2014;54(3):242-44. doi: 10.2176/nmc.cr2012-0239
11. Liberati A, Altman DG, Tetzlaff J, et al. The PRISMA statement for reporting systematic reviews and meta-analyses of studies that evaluate health care interventions: explanation and elaboration. *J Clin Epidemiol* 2009;62(10):e1-34. doi: 10.1016/j.jclinepi.2009.06.006 [published Online First: 2009/07/28]
12. Higgins JPT, Green S, The Cochrane C. Cochrane handbook for systematic reviews of interventions. Chisester: Wiley-Blackwell 2017.
13. Guyatt GH, Oxman AD, Vist GE, et al. GRADE: an emerging consensus on rating quality of evidence and strength of recommendations. *BMJ* 2008;336(7650):924-26. doi: 10.1136/bmj.39489.470347.AD
14. Moher D, Shamseer L, Clarke M, et al. Preferred reporting items for systematic review and meta-analysis protocols (PRISMA-P) 2015 statement. *Systematic reviews* 2015;4:1. doi: 10.1186/2046-4053-4-1 [published Online First: 2015/01/03]
15. Higgins JP, Altman DG, Gotzsche PC, et al. The Cochrane Collaboration's tool for assessing risk of bias in randomised trials. *BMJ (Clinical research ed)* 2011;343:d5928. doi: 10.1136/bmj.d5928 [published Online First: 2011/10/20]

1  
2  
3 **Funding statement**  
4

5 Supported with research funds from the Department of Neurosurgery, Medical University of Warsaw  
6 (1M5/N/18).  
7

8 **Competing interests statement.**  
9

10 None to declare.  
11  
12  
13  
14  
15  
16  
17  
18  
19  
20  
21  
22  
23  
24  
25  
26  
27  
28  
29  
30  
31  
32  
33  
34  
35  
36  
37  
38  
39  
40  
41  
42  
43  
44  
45  
46  
47  
48  
49  
50  
51  
52  
53  
54  
55  
56  
57  
58  
59  
60

For peer review only

# BMJ Open

## The Necessity Of Dural Tenting Sutures In Modern Neurosurgery: Protocol For A Systematic Review

|                                 |                                                                                                                                                                                                                                                                                                                                                                                                                                                                                                                                                                                                                                                                                                                                                                                                                                                                                                                                                                                                                                                                                                                                                                                                                                                                                                                                                                                                                             |
|---------------------------------|-----------------------------------------------------------------------------------------------------------------------------------------------------------------------------------------------------------------------------------------------------------------------------------------------------------------------------------------------------------------------------------------------------------------------------------------------------------------------------------------------------------------------------------------------------------------------------------------------------------------------------------------------------------------------------------------------------------------------------------------------------------------------------------------------------------------------------------------------------------------------------------------------------------------------------------------------------------------------------------------------------------------------------------------------------------------------------------------------------------------------------------------------------------------------------------------------------------------------------------------------------------------------------------------------------------------------------------------------------------------------------------------------------------------------------|
| Journal:                        | <i>BMJ Open</i>                                                                                                                                                                                                                                                                                                                                                                                                                                                                                                                                                                                                                                                                                                                                                                                                                                                                                                                                                                                                                                                                                                                                                                                                                                                                                                                                                                                                             |
| Manuscript ID                   | bmjopen-2018-027904.R1                                                                                                                                                                                                                                                                                                                                                                                                                                                                                                                                                                                                                                                                                                                                                                                                                                                                                                                                                                                                                                                                                                                                                                                                                                                                                                                                                                                                      |
| Article Type:                   | Protocol                                                                                                                                                                                                                                                                                                                                                                                                                                                                                                                                                                                                                                                                                                                                                                                                                                                                                                                                                                                                                                                                                                                                                                                                                                                                                                                                                                                                                    |
| Date Submitted by the Author:   | 13-Dec-2018                                                                                                                                                                                                                                                                                                                                                                                                                                                                                                                                                                                                                                                                                                                                                                                                                                                                                                                                                                                                                                                                                                                                                                                                                                                                                                                                                                                                                 |
| Complete List of Authors:       | Przepiórka, Łukasz; Department of Neurosurgery, Medical University of Warsaw<br>Kunert, Przemysław; Department of Neurosurgery, Medical University of Warsaw<br>Żyłkowski, Jarosław; Second Department of Radiology, Medical University of Warsaw<br>Fortuniak, Jan; Department of Neurosurgery and Oncology of Central Nervous System, Barlicki University Hospital, Medical University of Lodz<br>Larysz, Patrycja; Department of Neurosurgery, Medical University of Silesia, Regional Hospital, Sosnowiec<br>Szczepanek, Dariusz; Neurosurgery and Pediatric Neurosurgery Department in Lublin, Medical University of Lublin<br>Wiśniewski, Karol; Department of Neurosurgery and Oncology of Central Nervous System, Barlicki University Hospital, Medical University of Lodz<br>Jaskólski, Dariusz; Department of Neurosurgery and Oncology of Central Nervous System, Barlicki University Hospital, Medical University of Lodz<br>Ładziński, Piotr; Department of Neurosurgery, Medical University of Silesia, Regional Hospital, Sosnowiec<br>Rola, Radosław; Neurosurgery and Pediatric Neurosurgery Department in Lublin, Medical University of Lublin<br>Trojanowski, Tomasz; Neurosurgery and Pediatric Neurosurgery Department in Lublin, Medical University of Lublin<br>Marchel, Andrzej; Department of Neurosurgery, Medical University of Warsaw, Department of Neurosurgery, Medical University of Warsaw |
| <b>Primary Subject Heading</b>: | Evidence based practice                                                                                                                                                                                                                                                                                                                                                                                                                                                                                                                                                                                                                                                                                                                                                                                                                                                                                                                                                                                                                                                                                                                                                                                                                                                                                                                                                                                                     |
| Secondary Subject Heading:      | Neurology, Surgery                                                                                                                                                                                                                                                                                                                                                                                                                                                                                                                                                                                                                                                                                                                                                                                                                                                                                                                                                                                                                                                                                                                                                                                                                                                                                                                                                                                                          |
| Keywords:                       | craniotomy, extradural hematoma, dural tenting sutures                                                                                                                                                                                                                                                                                                                                                                                                                                                                                                                                                                                                                                                                                                                                                                                                                                                                                                                                                                                                                                                                                                                                                                                                                                                                                                                                                                      |
|                                 |                                                                                                                                                                                                                                                                                                                                                                                                                                                                                                                                                                                                                                                                                                                                                                                                                                                                                                                                                                                                                                                                                                                                                                                                                                                                                                                                                                                                                             |

SCHOLARONE™  
Manuscripts

## Title page

# The Necessity Of Dural Tenting Sutures In Modern Neurosurgery: Protocol For A Systematic Review

## Authors

Łukasz Przepiórka<sup>1</sup>, Przemysław Kunert<sup>1</sup>, Jarosław Żyłkowski<sup>2</sup>, Jan Fortuniak<sup>3</sup>, Patrycja Larysz<sup>4</sup>, Dariusz Szczepanek<sup>5</sup>, Karol Wiśniewski<sup>3</sup>, Dariusz Jaskólski<sup>3</sup>, Piotr Ładziński<sup>4</sup>, Radosław Rola<sup>5</sup>, Tomasz Trojanowski<sup>5</sup>, Andrzej Marchel<sup>1</sup>

## Affiliation

1 Department of Neurosurgery, Medical University of Warsaw, Warsaw, Poland

2 Second Department of Radiology, Medical University of Warsaw, Warsaw, Poland

3 Department of Neurosurgery and Oncology of Central Nervous System, Barlicki University Hospital, Medical University of Lodz, Lodz, Poland

4 Department of Neurosurgery, Medical University of Silesia, Regional Hospital, Sosnowiec, Poland

5 Neurosurgery and Pediatric Neurosurgery Department in Lublin, Medical University of Lublin, Lublin, Poland

## Contact information

Przemysław Kunert, Department of Neurosurgery, Medical University of Warsaw, Banacha St. 1a, 02-097 Warsaw, Poland, fax: +48 22 658 3653, email: przemyslaw.kunert@wum.edu.pl

## Guarantor of the review

Łukasz Przepiórka

## Contributions

ŁP conceived the presented idea and prepared the manuscript; PK critically revised the manuscript, AM validated the final version of the manuscript; JŻ analyzed the data; DJ, JF, and KW contributed to the design of the study; PŁ and PL helped supervise the project; RR, DS, and TT provided the methodologic background. All authors reviewed the final manuscript.

## Amendments

In the event of protocol amendments, the date of each amendment will be accompanied by a description of the change and the rationale.

## Sponsor

none

## Role of a sponsor and funder

not applicable



## 35 **Abstract**

### 36 **Introduction**

37 The ongoing need for dural tenting sutures in a contemporary neurosurgical practice has been  
38 questioned in the literature for over two decades. In the past, these sutures were supposed to  
39 prevent blood collecting in the potential space between the skull and the dura by elevating the  
40 latter. Theoretically, with modern hemostasis and proper postoperative care, this technique  
41 should not be necessary and the surgery time can be shortened. Unfortunately, there is no  
42 evidence-based proof to either support or reject this hypothesis.

### 43 **Methods and analysis**

44 The systematic review will be performed according to the Preferred Reporting Items for  
45 Systematic Reviews and Meta-Analysis (PRISMA) statement and The Cochrane Handbook for  
46 Systematic Reviews of Interventions. Eight electronic databases of peer-reviewed journals will be  
47 searched, as well as other sources. Eligible articles will be assessed against inclusion criteria.  
48 The intervention is not tenting the dura and this will be compared with the usual dural tenting  
49 sutures. Where possible, “summary of findings” tables will be generated.

### 50 **Ethics and dissemination**

51 Ethical committee approval is not required for a systematic review protocol. Findings will be  
52 presented at international neurosurgical conferences and published in a peer-reviewed medical  
53 journal.

### 54 **Systematic review registration**

55 PROSPERO 2018 CRD42018097089

### 56 **Keywords**

57 Dural tenting sutures, craniotomy, extradural hematoma

## 58 **Strengths and limitations of this study**

- 59 • To the best of our knowledge, this will be the first systematic review evaluating the necessity of  
60 dural tenting sutures.
- 61 • To obtain enough patient data, observational studies will be included with randomized  
62 controlled trials.
- 63 • The choice of inclusion criteria remains debatable as there may not be enough randomized  
64 clinical trials and, thus, other types of studies may be included.

## 65 Introduction

66 In the early days of neurosurgery, extradural hemorrhage (EDH) contributed to high mortality after  
67 craniotomies. Almost a century ago, Walter Dandy reported dural tenting sutures as an effective  
68 way of preventing postoperative EDH.<sup>1</sup> Over time, his technique gained in popularity and  
69 significance to finally become a neurosurgical standard. Dural tenting is a well-known method of  
70 stitching the dura to the bone or pericranium after craniotomy. This decreases the extradural  
71 space where EDH could arise and compresses dural vessels, which are potential sources of EDH.  
72 These sutures are known by many names (Table 1).<sup>2</sup> In addition, some terms distinguish dural  
73 tenting sutures that are placed in the center of the dural opening from those near the edge, as  
74 was originally described by Dandy. These central tenting sutures are named after J.L. Poppen,  
75 and are one of his many contributions to neurosurgery.<sup>3</sup>

76 Throughout the last 20 years, several researchers have expressed their growing doubt about the  
77 role of tenting sutures in contemporary neurosurgical practice. There have been several  
78 retrospective reports questioning the ongoing need for dural tenting sutures.<sup>2 4-6</sup> Apparently,  
79 Dandy's explanation about intraoperative hemostasis under hypotensive conditions being  
80 deceiving and subsequently causing EDH may be obsolete. These days, proper anesthesiology,  
81 including normovolemia and normotension, enables real-time evaluation of the hemostasis. The  
82 latter has been further improved by modern hemostatic agents, such as bone wax, electrocautery,  
83 oxidized cellulose polymer materials, collagen sponges, etc. Altogether, these improvements may  
84 be enough for effective and actual extradural hemostasis. Reports of some surgeons avoiding  
85 dural tenting sutures, in some papers<sup>5 7</sup> or in day-to-day practice, further support this explanation.

## 86 Study rationale

87 There is a risk of EDH formation – supposedly decreased with the use of dural tenting sutures –  
88 in the postoperative period and this should not be ignored. However, as mentioned earlier, studies

1  
2  
3 89 (the majority retrospective) have implied not tenting the dura is safe. Dural tenting prolongs the  
4  
5 90 time of surgery, which may be a reason to omit these sutures. Moreover, the sutures may  
6  
7 91 potentially increase the risk of adverse effects, such as cerebrospinal fluid (CSF) leak and  
8  
9 92 damage to cortical matter or blood vessels with subsequent subdural or intracerebral hemorrhage.  
10  
11 93 There have also been several reports of more unusual complications like subdural hygroma,<sup>8</sup>  
12  
13 94 granuloma,<sup>9</sup> or pial arteriovenous fistula.<sup>10</sup> Thus, refraining from dural tenting sutures would  
14  
15 95 shorten the surgery and reduce the operative risk.

16  
17  
18 96 Therefore, evaluation of this procedure is interesting not only from the surgical point of view, but  
19  
20 97 also by modern, evidence-based standards. Not a single systematic review has been performed  
21  
22 98 to date to establish the necessity of dural tenting. Moreover, its impact on short-term postoperative  
23  
24 99 headaches or CSF leak has not been established in an evidence-based manner. Thus, a  
25  
26 100 systematic review is necessary and subsequently allows for a meta-analysis. However, many  
27  
28 101 researches have evoked *a priori* preparation of protocols for a systematic review.<sup>11</sup> The aim of  
29  
30 102 registration and/or publication of protocols is to increase the quality of subsequent systematic  
31  
32 103 reviews. This is achieved by external editorial systems reducing publication bias and improving  
33  
34 104 transparency and accuracy.

## 35 36 37 38 39 105 Objective

40  
41 106 To prepare a protocol for a systematic review that will determine the safety of not tenting the dura  
42  
43 107 during an elective craniotomy.

## 44 45 46 47 108 Methods and analysis

48  
49 109 The review will be conducted according to the Cochrane Handbook for Systematic Reviews of  
50  
51 110 Intervention<sup>12</sup> and data will be reported in coherence with the PRISMA statement  
52  
53 111 recommendations.<sup>11</sup> The quality of evidence for each outcome will be assessed according to the  
54  
55  
56  
57  
58  
59  
60

1  
2  
3 112 Grading of Recommendations Assessment, Development, and Evaluation (GRADE) framework.<sup>13</sup>  
4  
5 113 EndNote X8.2 (or newer version) and Review Manager 5.3 (or newer version) software will be  
6  
7 114 used for electronic data management. This review has been registered with PROSPERO  
8  
9 115 (registration number: CRD42018097089). Moreover, this protocol follows the PRISMA-P 2015  
10  
11 116 statement.<sup>14</sup>  
12  
13

## 14 117 Eligibility criteria

15  
16  
17 118 The type of studies included will be primarily randomized controlled trials (RCT) and quasi-RCTs.  
18  
19 119 Moreover, to obtain enough statistical power, the study will also include cross-over studies,  
20  
21 120 published in English literature after 1970, and case series.  
22  
23

## 24 121 Participants

25  
26 122 The participants will include all patients who qualify for a craniotomy, regardless of their diagnosis.  
27  
28 123 Demographic criteria will not be limited.  
29  
30

## 31 124 Interventions and comparisons

32  
33  
34 125 As tenting the dura is a widely accepted reference method, it is the authors' firm belief that the  
35  
36 126 intervention should be not tenting the dura. Thus, patients with dural tenting sutures would  
37  
38 127 constitute a control group. However, different allocations of control and intervention groups will  
39  
40 128 be included as well as a comparison of dural tenting and not tenting. The intervention will be  
41  
42 129 considered in a dichotomous manner using minimum information, such as "tenting the dura" and,  
43  
44 130 conversely, "not tenting the dura", regardless of the number, position, or type of sutures.  
45  
46

## 47 131 Outcomes

48  
49 132 The outcomes that are considered likely to be meaningful are: reoperation due to EDH and the  
50  
51 133 postoperative 30-day mortality. However, the latter is not suitable for a primary endpoint as it is  
52  
53 134 affected by many factors (for instance, preoperative condition of the patient and type of  
54  
55  
56  
57  
58  
59  
60

1  
2  
3 135 intracranial lesion) and the heterogeneity of the group. Thus, reoperation due to EDH should be  
4  
5 136 the primary outcome, as it is the most accurate way to measure the safety of not tenting the dura.  
6  
7

### 8 137 Information sources

9  
10 138 The systematic review will cover standard bibliographic databases: MEDLINE, PUBMED,  
11  
12 139 EMBASE, Google Scholar, Cochrane Library, ProQuest, ScienceDirect, as well as trial registers  
13  
14 140 (clinicaltrials.gov, EU register, ISRCTN), conference abstracts and grey literature searched with  
15  
16 141 Google Web Search, and systematic review registers (PROSPERO). Moreover, the references  
17  
18 142 of all relevant articles will be scanned.  
19  
20

### 21 143 Search strategy

22  
23  
24 144 The search strategy for PUBMED and EMBASE is presented in Table 2. Table 3 provides  
25  
26 145 additional search phrases that may support and/or modify the main search. A PRISMA flow  
27  
28 146 diagram will be included in the review.  
29  
30

### 31 147 Study records

### 32 148 Selection process

33  
34  
35  
36 149 All search results will be imported into EndNote and the software will remove any duplicates.  
37  
38 150 Then, two independent reviewers (ŁP, PK) will perform a preliminary screening of titles and  
39  
40 151 abstracts for inclusion. At this stage, all conflicts will be included. Next, the full text of studies will  
41  
42 152 be obtained, and two reviewers will apply inclusion criteria to identify relevant studies to be  
43  
44 153 included in the systematic review. Conflicts will be discussed, and when needed, a third reviewer  
45  
46 154 (AM) will be involved. The review will contain a table of included and excluded studies with their  
47  
48 155 characteristics and reasons for inclusion and exclusion.  
49  
50  
51  
52  
53  
54  
55  
56  
57  
58  
59  
60

## 156 Data collection process and data items

157 Data will be extracted by one author (ŁP) using a previously prepared standardized form at the  
158 study level. The following data will be obtained: 1) characteristics of the group of participants (age,  
159 sex, diagnosis); 2) type of surgery (supratentorial vs. infratentorial vs. skull base, elective vs.  
160 emergency, craniotomy vs. craniectomy) and indication (aneurysm, tumor, trauma, epilepsy, etc.);  
161 3) definition of an intervention (number of tenting sutures, information about wound drainage,  
162 hemostatic agents used during closure of the dura) and a control group; and 4) outcome measures  
163 (number of EDH, number of reoperations, deaths, midline shift, size and volume of extradural  
164 collections), as discussed earlier.

## 165 Risk of bias in individual studies

166 The risk of bias in the individual studies will be assessed at the study level. It will be performed  
167 by one author (ŁP) using the Cochrane Collaboration's Risk of Bias Tool [15](#) and checked by a  
168 second reviewer (PK).

## 169 Data Synthesis

170 There will be two categories of data collection depending on the type of endpoint, either binary or  
171 continuous. Risk ratios will be calculated to measure the risk of specific events, such as  
172 reoperation due to extradural hematoma, CSF leak, death, and the standardized mean  
173 differences for the midline shift, volume, and size of the extradural collection. We will pool the  
174 results using a random-effects meta-analysis, with standardized mean differences for continuous  
175 outcomes and risk ratios for binary outcomes, and calculate 95% confidence intervals and two  
176 sided P values for each outcome. The heterogeneity of effect measures between the studies will  
177 be assessed using both the  $\chi^2$  test and the I<sup>2</sup> statistic. We will consider an I<sup>2</sup> value greater than  
178 50% to be indicative of substantial heterogeneity.

## 179 Subgroup analysis

180 If sufficient data are available, we plan to conduct subgroup analyses according to craniotomy vs.  
181 craniectomy, supratentorial vs. infratentorial surgery, skull base vs. no skull base in range of the  
182 surgery, and elective vs. emergency surgery. Such actions will allow the identification of potential  
183 sources of heterogeneity.

## 184 Patients and Public Involvement

185 This type of study does not require patients and or public involvement.

## 186 Discussion

187 The choice of proper eligibility criteria is important when conducting a systematic review. In this  
188 protocol, there was a lot consideration regarding the choice of population, intervention,  
189 comparison and outcome (PICO). Some authors regard only craniotomies as suitable for the  
190 study, in contrast to craniectomies. The reason for this is that restored bone allows the  
191 measurement of the potential fluid collection volume in intracranial-extradural space and the  
192 assessment of how it affects the whole brain in the closed cranial cavity. Nevertheless, it is  
193 reasonable to include studies with craniectomies.

194 Other valuable endpoints could include any new neurologic deficit or previously existing  
195 deterioration, an external or internal CSF leak requiring treatment, deterioration of postoperative  
196 headaches, extradural fluid collection (EDH, CSF, air, etc.), and the midline shift. None of these  
197 will be included if there is not enough data for testing.

198 Examining the most basic and elementary procedures may, surprisingly, be the most challenging  
199 and intimidating task. Due to a lack of such actions, it is possible that most brain surgeons have  
200 been using surgical techniques that bring no benefit and only extend the operation. Hence, there

1  
2  
3 201 is a great need for this study. The results may finally determine if dural tenting sutures are  
4  
5 202 necessary in modern neurosurgery.  
6  
7

8 203 **Ethics and dissemination**  
9

10 204 Ethical committee approval is not required for a systematic review protocol. Findings will be  
11  
12 205 presented at international neurosurgical conferences and published in a peer-reviewed medical  
13  
14 206 journal.  
15  
16  
17  
18  
19  
20  
21  
22  
23  
24  
25  
26  
27  
28  
29  
30  
31  
32  
33  
34  
35  
36  
37  
38  
39  
40  
41  
42  
43  
44  
45  
46  
47  
48  
49  
50  
51  
52  
53  
54  
55  
56  
57  
58  
59  
60

For peer review only



## Tables

| Dural tenting sutures synonyms |
|--------------------------------|
| Hitch sutures                  |
| Tack-up sutures                |
| Dural periosteal sutures       |
| Tacking sutures                |
| Stay sutures                   |
| Suspension sutures             |
| Sleeper sutures                |
| Dandy sutures                  |
| Poppen sutures                 |

Table 1. Synonyms of dural tenting sutures

### Search strategy for PubMed database

"dural sutures" OR "dural tenting sutures" OR "dura mater sutures" OR "dural stitches" OR  
 "dural tenting stitches" OR "dura mater stitches" OR "hitch sutures" OR "hitch sutures of the  
 dura" OR "hitching of the dura" OR "dural hitching" OR "hitch sutures of the dura" OR "hitching  
 the dura" OR "hitching of the dura"  
 OR "tenting sutures" OR "tenting stitches" OR "tenting of the dura" OR "dural tenting" OR "dural  
 tenting sutures" OR "dural tenting stitches" OR "tack-up sutures" OR "tack-up stitches" OR  
 "tack-up dura" OR "tack-up dural" OR "tacking sutures" OR "tacking sutures" OR "tacking dura  
 sutures" OR "tacking dural sutures" OR "tacking dura" OR "tacking dural stitches" OR "tacking  
 dural stitches" OR "tacking up dura" OR "tacking up sutures" OR "tacking up stitches" OR  
 "dural periosteal sutures" OR "dural periosteal stitches" OR "stay sutures" OR "dural stay  
 sutures" OR "stay stitches" OR "dural stay stitches" OR "suspension sutures" OR "suspension  
 dural sutures" OR "suspension dura sutures" OR "suspension stitches" OR "suspension dural  
 stitches" OR "suspension dura stitches" OR "dural suspension" OR "suspending the dura" OR  
 "suspension of the dura" OR "sleeper sutures" OR "sleeper stitches" OR "epidural sutures" OR  
 "epidural stitches" OR "dural suture" OR "dural tenting suture" OR "dura mater suture" OR  
 "dural stitch" OR "dural tenting stitch" OR "dura mater stitch" OR "hitch stitch" OR "hitch stitch  
 of the dura" OR "hitching of the dura" OR "dural hitching" OR "hitch stitch of the dura" OR  
 "hitching the dura" OR "hitching of the dura" OR "tenting suture" OR "tenting stitch" OR "tenting  
 of the dura" OR "dural tenting" OR "dural tenting suture" OR "dural tenting stitch" OR "tack-up  
 suture" OR "tack-up stitch" OR "tack-up dura" OR "tack-up dural" OR "tacking stitch" OR  
 "tacking suture" OR "tacking dura suture" OR "tacking dural suture" OR "tacking dura" OR  
 "tacking dural stitch" OR "tacking dural stitch" OR "tacking up dura" OR "tacking up suture"  
 OR "tacking up stitch" OR "dural periosteal suture" OR "dural periosteal stitch" OR "stay suture"  
 OR "dural stay suture" OR "stay stitch" OR "dural stay stitch" OR "suspension suture" OR  
 "suspension dural suture" OR "suspension dura suture" OR "suspension stitch" OR  
 "suspension dural stitch" OR "suspension dura stitch" OR "dural suspension" OR "suspending  
 the dura" OR "suspension of the dura" OR "sleeper suture" OR "sleeper stitch" OR "epidural  
 suture" OR "epidural stitch" OR "extradural stitch" OR "extradural suture"

Table 2. PubMed search strategy

| Additional search phrases in PubMed database                                                                  |
|---------------------------------------------------------------------------------------------------------------|
| ("Dura Mater/surgery"[Mesh]) AND ("Hematoma, Epidural, Cranial/prevention and control"[Mesh])                 |
| (("Dura Mater"[Mesh] OR "Dura Mater"[TW])) AND ("Suture Techniques"[Mesh] OR ["Suture Techniques"[TW])        |
| ("Dura Mater"[Mesh]) AND "Hematoma, Epidural, Cranial/prevention and control"[Mesh]                           |
| (("Postoperative Period"[Mesh] OR "Postoperative Period"[text word])) AND "Hematoma, Epidural, Cranial"[Mesh] |

Table 3. Additional search phrases in PubMed database.

For peer review only

## References

1. Dandy WE. Surgery of the brain. Hagerstown, Md.: Prior 1945.
2. Winston KR. Efficacy of dural tenting sutures. *J Neurosurg* 1999;91(2):180-4. doi: 10.3171/jns.1999.91.2.0180 [published Online First: 1999/08/05]
3. Poppen JL. Prevention of postoperative extradural hematoma. *Archives of Neurology & Psychiatry* 1935;34(5):1068-69. doi: 10.1001/archneurpsyc.1935.02250230140012
4. Winston KR. Dural tenting sutures in pediatric neurosurgery. *Pediatr Neurosurg* 1998;28(5):230-5. doi: 10.1159/000028656 [published Online First: 1998/09/10]
5. Swayne OB, Horner BM, Dorward NL. The hitch stitch: an obsolete neurosurgical technique? *British journal of neurosurgery* 2002;16(6):541-4; discussion 44. [published Online First: 2003/03/06]
6. Gunasena P, Bandara L, Jayaratne C, et al. Evaluation of risk of developing EDH associated with large craniectomy closure without hitching the dura. *Brain injury* 2010;24(3):129. doi: 10.3109/02699051003648227
7. Winston KR. Efficacy of dural tenting sutures. *Journal of neurosurgery* 1999;91(2):180-84.
8. Jha AN, Morris K. Iatrogenic ex vacuo subdural hygroma: and a complication of the modified "Poppen" suture. *Journal of neurology, neurosurgery, and psychiatry* 1986;49(9):1084-5. [published Online First: 1986/09/01]
9. Onodera H, Furuya Y, Uchida M, et al. Intracranial foreign body granuloma caused by dural tenting suture. *British journal of neurosurgery* 2011;25(5):652-4. doi: 10.3109/02688697.2011.568641 [published Online First: 2011/08/19]
10. Nishiyama Y, Kanemaru K, Yoshioka H, et al. Intracranial pial arteriovenous fistula caused by dural tenting: Case report. *Neurologia medico-chirurgica* 2014;54(3):242-44. doi: 10.2176/nmc.cr2012-0239
11. Liberati A, Altman DG, Tetzlaff J, et al. The PRISMA statement for reporting systematic reviews and meta-analyses of studies that evaluate health care interventions: explanation and elaboration. *J Clin Epidemiol* 2009;62(10):e1-34. doi: 10.1016/j.jclinepi.2009.06.006 [published Online First: 2009/07/28]
12. Higgins JPT, Green S, The Cochrane C. Cochrane handbook for systematic reviews of interventions. Chisester: Wiley-Blackwell 2017.
13. Guyatt GH, Oxman AD, Vist GE, et al. GRADE: an emerging consensus on rating quality of evidence and strength of recommendations. *BMJ* 2008;336(7650):924-26. doi: 10.1136/bmj.39489.470347.AD
14. Moher D, Shamseer L, Clarke M, et al. Preferred reporting items for systematic review and meta-analysis protocols (PRISMA-P) 2015 statement. *Systematic reviews* 2015;4:1. doi: 10.1186/2046-4053-4-1 [published Online First: 2015/01/03]
15. Higgins JP, Altman DG, Gotzsche PC, et al. The Cochrane Collaboration's tool for assessing risk of bias in randomised trials. *BMJ (Clinical research ed)* 2011;343:d5928. doi: 10.1136/bmj.d5928 [published Online First: 2011/10/20]

1  
2  
3  
4  
5  
6  
7  
8  
9  
10  
11  
12  
13  
14  
15  
16  
17  
18  
19  
20  
21  
22  
23  
24  
25  
26  
27  
28  
29  
30  
31  
32  
33  
34  
35  
36  
37  
38  
39  
40  
41  
42  
43  
44  
45  
46  
47  
48  
49  
50  
51  
52  
53  
54  
55  
56  
57  
58  
59  
60

**Funding statement**

Supported with research funds from the Department of Neurosurgery, Medical University of Warsaw (1M5/N/18).

**Competing interests statement.**

None to declare.

For peer review only
